# Supplementary material for: The short-chain fatty acid acetate reduces appetite via a central homeostatic mechanism
Source: PubMed Central journal article supplement (PMC4015327; doi:10.1038/ncomms4611), 2014-04-29
Supplement: ncomms4611-s1.pdf [file ncomms4611-s1.pdf]

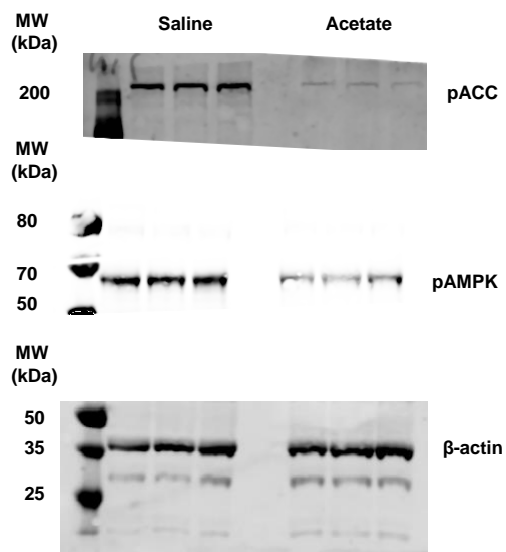

Supplementary Fig. 1:

Full length immunoblots of hypothalamic pAMPK and pACC levels in mice 30 minutes after the intraperitoneal injection of either saline or acetate compared with B-Actin control. Numbers represent molecular weight annotation
